# Supplementary material for: Physical working conditions as covered in European monitoring questionnaires
Source: PubMed Central journal article supplement (PMC5460526; doi:10.1186/s12889-017-4465-7), 2017-06-05
Supplement: 12889_2017_4465_MOESM2_ESM.pdf [file 12889_2017_4465_MOESM2_ESM.pdf]

| Country Domain                                                   | Dimesions                            | Denmark<br>Work Environment and Health in Denmark (survey 2012, 2014, 2016)                                                                                                                                                                                       | Norway<br>Survey of living conditions: Working environment                                                                                                                                                                                                                                   | Finland<br>Finland: The Finnish National Work and Health Survey                                                                                                                                                                                                                                                                                                            | Netherlands<br>Netherlands Working Conditions Survey                                                                                                                                       | Germany<br>German BIBB/BAuA Employment Survey 2011/2012                                                                                                                                                                                                                                                                                                                       | Spain<br>Spanish National Working Conditions survey                                                                                                                                                                                                                                     | Europe<br>European working conditions survey                                                                                                                                                                                                                                            |
|------------------------------------------------------------------|--------------------------------------|-------------------------------------------------------------------------------------------------------------------------------------------------------------------------------------------------------------------------------------------------------------------|----------------------------------------------------------------------------------------------------------------------------------------------------------------------------------------------------------------------------------------------------------------------------------------------|----------------------------------------------------------------------------------------------------------------------------------------------------------------------------------------------------------------------------------------------------------------------------------------------------------------------------------------------------------------------------|--------------------------------------------------------------------------------------------------------------------------------------------------------------------------------------------|-------------------------------------------------------------------------------------------------------------------------------------------------------------------------------------------------------------------------------------------------------------------------------------------------------------------------------------------------------------------------------|-----------------------------------------------------------------------------------------------------------------------------------------------------------------------------------------------------------------------------------------------------------------------------------------|-----------------------------------------------------------------------------------------------------------------------------------------------------------------------------------------------------------------------------------------------------------------------------------------|
| Lifting, holding & carrying of loads /pushing & pulling of loads | Lifting, holding & carrying of loads | How much of your time at work do you carry or lift objects? (Is your answer "never" please skip to question 27)[almost all the time, approx. 3/4 of the time, approx 1/2 of the time, rarely,never 1/4 of the time, rarely,never]                                 | Do have to lift anything that weighs more than 20 kg on a daily basis, and if so how many times a day? [Yes, at least 20 times a day, yes, 5-19 times, yes, 1-4 times,no]                                                                                                                    | Does your work involve lifting or carrying by hand, without any equipment? [1 not at all If yes 2 occasionally 3 weekly 4 Daily 5 several times a day 6 or several times an hour ? 8 Cannot say 9 No answer]                                                                                                                                                               |                                                                                                                                                                                            | I will now read out a number of working conditions to you. For each item, please tell me whether these occur on your occupation as <insert occupation from F100-102> frequently, sometimes, rarely or never. - Lifting and carrying loads of more than <for male target persons insert: 20 kg, for females insert: 10 kg > [1: frequently; 2: sometimes; 3: rarely, 4: never] |                                                                                                                                                                                                                                                                                         |                                                                                                                                                                                                                                                                                         |
|                                                                  |                                      | How much does what you carry or lift typically weigh? [Less than 5 kg, 5-15 kg 16-29kg,30 kg or more]                                                                                                                                                             | Do have to lift anything that weighs more than 10 kg on a daily basis, and if so how many times a day? [Yes, at least 20 times a day, yes, 5-19 times, yes, 1-4 times,no]                                                                                                                    | Do the loads that you normally handle just manually, weight [less than 5 kilos, 5-25 kilos or over 25 kilos?]                                                                                                                                                                                                                                                              |                                                                                                                                                                                            |                                                                                                                                                                                                                                                                                                                                                                               | Please tell me, using the same scale, does your main paid job involve lifting or moving people? [1 All of the time, 2 Almost all of the time, 3 Around 3/4 of the time, 4 Around half of the time, 5 Around 1/4 of the time, 6 Almost never, 7 Never, 8 DK (don't know), 9 Ref]         | Please tell me, using the same scale, does your main paid job involve lifting or moving people? [1 All of the time, 2 Almost all of the time, 3 Around 3/4 of the time, 4 Around half of the time, 5 Around 1/4 of the time, 6 Almost never, 7 Never, 8 DK (don't know), 9 Ref]         |
|                                                                  |                                      | When necessary, how often do you use aids during lifts or moving of things or individuals? [always, often, sometimes, rarely, never]                                                                                                                              | If yes to the two questions above are you normally lifting people? [YES/NO]                                                                                                                                                                                                                  |                                                                                                                                                                                                                                                                                                                                                                            |                                                                                                                                                                                            |                                                                                                                                                                                                                                                                                                                                                                               |                                                                                                                                                                                                                                                                                         |                                                                                                                                                                                                                                                                                         |
|                                                                  | Pushing and pulling of loads         | How much of your time at work do you push or pull something? [almost all the time, approx. 3/4 of the time, approx 1/2 of the time, approx 1/4 of the time, rarely,never]                                                                                         |                                                                                                                                                                                                                                                                                              |                                                                                                                                                                                                                                                                                                                                                                            |                                                                                                                                                                                            |                                                                                                                                                                                                                                                                                                                                                                               |                                                                                                                                                                                                                                                                                         |                                                                                                                                                                                                                                                                                         |
|                                                                  |                                      | How often does it happen that you lift or move things or individuals, even though you ought to be two doing it? [always, often ,sometimes ,rarely, never]                                                                                                         |                                                                                                                                                                                                                                                                                              |                                                                                                                                                                                                                                                                                                                                                                            |                                                                                                                                                                                            |                                                                                                                                                                                                                                                                                                                                                                               |                                                                                                                                                                                                                                                                                         |                                                                                                                                                                                                                                                                                         |
|                                                                  | Mixture of both                      |                                                                                                                                                                                                                                                                   |                                                                                                                                                                                                                                                                                              |                                                                                                                                                                                                                                                                                                                                                                            | Does your job require you to apply a lot of force (pushing/lifting/etc.) or do you use equipment or appliances that require you to use a lot of force ? [yes regularly, yes sometimes, no] |                                                                                                                                                                                                                                                                                                                                                                               | ... carrying or moving heavy loads? [1 All of the time, 2 Almost all of the time, 3 Around 3/4 of the time, 4 Around half of the time, 5 Around 1/4 of the time, 6 Almost never, 7 Never, 8 DK (don't know), 9 Ref]                                                                     | ... carrying or moving heavy loads? [1 All of the time, 2 Almost all of the time, 3 Around 3/4 of the time, 4 Around half of the time, 5 Around 1/4 of the time, 6 Almost never, 7 Never, 8 DK (don't know), 9 Ref]                                                                     |
| Manual work processes / repetitive hand-arm movements            | Repetitive movements                 | How much of your time at work do you make the same arm movements several times a minute (for example, packaging ,assembly, machine feeding, cutting)?[almost all the time, approx. 3/4 of the time, approx 1/2 of the time, approx 1/4 of the time, rarely,never] | Does your work involve repeated movements with just one of your hands or arms? Yes/no. If yes, how much of the time do you do this during a normal working day? [almost the whole time, approx. 3/4 of the time, approx. half of the time, approx. 1/4 of the time, very little of the time] | Does your work involve repeated hand movements several times a minute? These occur in such things as production line and assembly work, pricing goods or goods from a conveyor belt. This question does not mean writing on a typewriter or computer. [1 not at all If yes 2 daily for at least 1-2 hours 3 less than an hour a day 4 almost every day 5 or occasionally?] | Does your job require you to make repetitive movements? [yes regularly, yes sometimes, no]                                                                                                 |                                                                                                                                                                                                                                                                                                                                                                               | Please tell me, using the same scale, does your main paid job involve repetitive hand or arm movements? [1 All of the time, 2 Almost all of the time, 3 Around 3/4 of the time, 4 Around half of the time, 5 Around 1/4 of the time, 6 Almost never, 7 Never, 8 DK (don't know), 9 Ref] | Please tell me, using the same scale, does your main paid job involve repetitive hand or arm movements? [1 All of the time, 2 Almost all of the time, 3 Around 3/4 of the time, 4 Around half of the time, 5 Around 1/4 of the time, 6 Almost never, 7 Never, 8 DK (don't know), 9 Ref] |

| Country Domain                                                   | Dimesions                             | Denmark<br>Work Environment and Health in Denmark (survey 2012, 2014, 2016)                                                                                                                                                                       | Norway<br>Survey of living conditions: Working environment                                                                                                                                                                                                                                                                                                                                       | Finland<br>Finland: The Finnish National Work and Health Survey                                                                                                                                                                      | Netherlands<br>Netherlands Working Conditions Survey | Germany<br>German BIBB/BAuA Employment Survey 2011/2012                                                                                                                                                                                                                                                                                                                       | Spain<br>Spanish National Working Conditions survey                                                                                                                                           | Europe<br>European working conditions survey                                                                                                                                                  |
|------------------------------------------------------------------|---------------------------------------|---------------------------------------------------------------------------------------------------------------------------------------------------------------------------------------------------------------------------------------------------|--------------------------------------------------------------------------------------------------------------------------------------------------------------------------------------------------------------------------------------------------------------------------------------------------------------------------------------------------------------------------------------------------|--------------------------------------------------------------------------------------------------------------------------------------------------------------------------------------------------------------------------------------|------------------------------------------------------|-------------------------------------------------------------------------------------------------------------------------------------------------------------------------------------------------------------------------------------------------------------------------------------------------------------------------------------------------------------------------------|-----------------------------------------------------------------------------------------------------------------------------------------------------------------------------------------------|-----------------------------------------------------------------------------------------------------------------------------------------------------------------------------------------------|
| Lifting, holding & carrying of loads /pushing & pulling of loads | Lifting, holding & carrying of loads  | How much of your time at work do you carry or lift objects? (Is your answer "never" please skip to question 27)[almost all the time, approx. 3/4 of the time, approx 1/2 of the time, approx 1/4 of the time, rarely,never]                       | Do have to lift anything that weighs more than 20 kg on a daily basis, and if so how many times a day? [Yes, at least 20 times a day, yes, 5-19 times, yes, 1-4 times, no]                                                                                                                                                                                                                       | Does your work involve lifting or carrying by hand, without any equipment? [1 not at all<br>If yes<br>2 occasionally<br>3 weekly<br>4 Daily<br>5 several times a day<br>6 or several times an hour ?<br>8 Cannot say<br>9 No answer] |                                                      | I will now read out a number of working conditions to you. For each item, please tell me whether these occur on your occupation as <insert occupation from F100-102> frequently, sometimes, rarely or never. - Lifting and carrying loads of more than <for male target persons insert: 20 kg, for females insert: 10 kg > [1: frequently; 2: sometimes; 3: rarely; 4: never] |                                                                                                                                                                                               |                                                                                                                                                                                               |
| Working standing / walking                                       | Working standing only                 |                                                                                                                                                                                                                                                   | Do you work standing up? [almost the whole time, approx. 3/4 of the time, approx. half of the time, approx. 1/4 of the time, very little of the time]                                                                                                                                                                                                                                            |                                                                                                                                                                                                                                      |                                                      | I will now read out a number of working conditions to you. For each item, please tell me whether these occur on your occupation as <insert occupation from F100-102> frequently, sometimes, rarely or never. - Working while standing. How frequently does this happen? [1: frequently; 2: sometimes; 3: rarely; 4: never]                                                    | ... standing? [1 All of the time, 2 Almost all of the time, 3 Around 3/4 of the time, 4 Around half of the time, 5 Around 1/4 of the time, 6 Almost never, 7 Never, 8 DK (don't know), 9 Ref] | ... standing? [1 All of the time, 2 Almost all of the time, 3 Around 3/4 of the time, 4 Around half of the time, 5 Around 1/4 of the time, 6 Almost never, 7 Never, 8 DK (don't know), 9 Ref] |
|                                                                  | Working walking only                  |                                                                                                                                                                                                                                                   | How much of the time do you walk around during a normal working day? [almost the whole time, approx. 3/4 of the time, approx. half of the time, approx. 1/4 of the time, very little of the time]                                                                                                                                                                                                |                                                                                                                                                                                                                                      |                                                      |                                                                                                                                                                                                                                                                                                                                                                               |                                                                                                                                                                                               |                                                                                                                                                                                               |
|                                                                  | Mixture of standing and walking       | How much of your time at work do you walk or stand? [almost all the time, approx. 3/4 of the time, approx 1/2 of the time, approx 1/4 of the time, rarely,never]                                                                                  |                                                                                                                                                                                                                                                                                                                                                                                                  | Is the nature of your work mainly [1 sedentary<br>2 or are you standing or walking<br>3 changing between walking, standing and sitting]                                                                                              |                                                      |                                                                                                                                                                                                                                                                                                                                                                               |                                                                                                                                                                                               |                                                                                                                                                                                               |
| Working sitting                                                  | Working sitting                       | How much of your time at work do you sit down? [almost all the time, approx. 3/4 of the time, approx 1/2 of the time, approx 1/4 of the time, rarely,never]                                                                                       | How much of the time do you work sitting down during a normal working day? almost the whole time, approx. 3/4 of the time, approx. half of the time, approx. 1/4 of the time, very little of the time                                                                                                                                                                                            | Is the nature of your work mainly [1 sedentary<br>2 or are you standing or walking<br>3 changing between walking, standing and sitting]                                                                                              |                                                      |                                                                                                                                                                                                                                                                                                                                                                               |                                                                                                                                                                                               |                                                                                                                                                                                               |
| Awkward body postures                                            | Work at or above shoulder height      | How much of your time at work do you keep your arms lifted at or above shoulder level? [almost all the time, approx. 3/4 of the time, approx 1/2 of the time, approx 1/4 of the time, rarely,never]                                               | Do you work with your hands raised to shoulder height or higher? [almost the whole time, approx. 3/4 of the time, approx. half of the time, approx . 1/4 of the time, very little of the time]                                                                                                                                                                                                   | Does your work involve working with one or both hands above shoulder height? [1 not at all<br>If yes<br>2 daily for at least 1-2 hours<br>3 less than an hour a day<br>4 almost every day<br>5 or occasionally?]                     |                                                      |                                                                                                                                                                                                                                                                                                                                                                               |                                                                                                                                                                                               |                                                                                                                                                                                               |
|                                                                  | Working with back in awkward position | How much of your time at work do you work with your back twisted or doubled over without supporting yourself with your hands or arms?[almost all the time, approx. 3/4 of the time, approx 1/2 of the time, approx 1/4 of the time, rarely,never] | Do you work in positions where you are leaning forward without supporting yourself on your hands or arms? Yes/no. If yes, how much of the time do you do this during a normal working day? [almost the whole time, approx. 3/4 of the time, approx. half of the time, approx. 1/4 of the time, very little of the time] Two follow up questions to this question under taxonomy mixed exposures) | Does your work involve stooping or otherwise having your back in an awkward working position? [1 not at all<br>If yes<br>2 daily for at least 1-2 hours<br>3 less than an hour a day<br>4 almost every day<br>5 or occasionally?]    |                                                      |                                                                                                                                                                                                                                                                                                                                                                               |                                                                                                                                                                                               |                                                                                                                                                                                               |
|                                                                  |                                       |                                                                                                                                                                                                                                                   | When working in those positions [where you are leaning forward without supporting yourself on your hands or arms], do you work in those positions with your back twisted? [Yes/no]                                                                                                                                                                                                               |                                                                                                                                                                                                                                      |                                                      |                                                                                                                                                                                                                                                                                                                                                                               |                                                                                                                                                                                               |                                                                                                                                                                                               |
|                                                                  |                                       |                                                                                                                                                                                                                                                   | When working like this [where you are leaning forward without supporting yourself on your hands or arm with your back twisted] do you need to lift anything that weighs more than 10 kg? [YES/NO]                                                                                                                                                                                                |                                                                                                                                                                                                                                      |                                                      |                                                                                                                                                                                                                                                                                                                                                                               |                                                                                                                                                                                               |                                                                                                                                                                                               |

| Country Domain                                                   | Dimesions                                         | Denmark<br>Work Environment and Health in Denmark (survey 2012, 2014, 2016)                                                                                                                                                     | Norway<br>Survey of living conditions: Working environment                                                                                                                                                                                             | Finland<br>Finland: The Finnish National Work and Health Survey                                                                                                                                                                         | Netherlands<br>Netherlands Working Conditions Survey                                                        | Germany<br>German BIBB/BAuA Employment Survey 2011/2012                                                                                                                                                                                                                                                                                                                          | Spain<br>Spanish National Working Conditions survey                                                                                                                                                                                                                                                                              | Europe<br>European working conditions survey                                                                                                                                                                                                                                                                                     |
|------------------------------------------------------------------|---------------------------------------------------|---------------------------------------------------------------------------------------------------------------------------------------------------------------------------------------------------------------------------------|--------------------------------------------------------------------------------------------------------------------------------------------------------------------------------------------------------------------------------------------------------|-----------------------------------------------------------------------------------------------------------------------------------------------------------------------------------------------------------------------------------------|-------------------------------------------------------------------------------------------------------------|----------------------------------------------------------------------------------------------------------------------------------------------------------------------------------------------------------------------------------------------------------------------------------------------------------------------------------------------------------------------------------|----------------------------------------------------------------------------------------------------------------------------------------------------------------------------------------------------------------------------------------------------------------------------------------------------------------------------------|----------------------------------------------------------------------------------------------------------------------------------------------------------------------------------------------------------------------------------------------------------------------------------------------------------------------------------|
| Lifting, holding & carrying of loads /pushing & pulling of loads | Lifting, holding & carrying of loads              | How much of your time at work do you carry or lift objects?<br>(Is your answer "never" please skip to question 27)[almost all the time, approx. 3/4 of the time, approx 1/2 of the time, approx 1/4 of the time, rarely,never]  | Do have to lift anything that weighs more than 20 kg on a daily basis, and if so how many times a day?<br>[Yes, at least 20 times a day, yes, 5-19 times, yes, 1-4 times,no]                                                                           | Does your work involve lifting or carrying by hand, without any equipment?<br>[1 not at all<br>If yes<br>2 occasionally<br>3 weekly<br>4 Daily<br>5 several times a day<br>6 or several times an hour ?<br>8 Cannot say<br>9 No answer] |                                                                                                             | I will now read out a number of working conditions to you. For each item, please tell me whether these occur on your occupation as <insert occupation from F100-102> frequently, sometimes, rarely or never.<br>- Lifting and carrying loads of more than <for male target persons insert: 20 kg, for females insert: 10 kg > [1: frequently; 2: sometimes; 3: rarely, 4: never] |                                                                                                                                                                                                                                                                                                                                  |                                                                                                                                                                                                                                                                                                                                  |
|                                                                  | Working squatting and kneeling                    | How much of your time at work do you work in a squat or lie on your knees when you are working?<br>[almost all the time, approx. 3/4 of the time, approx 1/2 of the time, approx 1/4 of the time, rarely,never]                 | Do you need to squat or kneel in the course of your work? [almost the whole time, approx. 3/4 of the time, approx. half of the time, approx. 1/4 of the time, very little of the time]                                                                 |                                                                                                                                                                                                                                         |                                                                                                             |                                                                                                                                                                                                                                                                                                                                                                                  |                                                                                                                                                                                                                                                                                                                                  |                                                                                                                                                                                                                                                                                                                                  |
|                                                                  | Working with head bent forward                    |                                                                                                                                                                                                                                 | Do you work with your head bent forward? Yes/no. If yes, how much of the time do you do this during a normal working day? [almost the whole time, approx. 3/4 of the time, approx. half of the time, approx. 1/4 of the time, very little of the time] |                                                                                                                                                                                                                                         |                                                                                                             |                                                                                                                                                                                                                                                                                                                                                                                  |                                                                                                                                                                                                                                                                                                                                  |                                                                                                                                                                                                                                                                                                                                  |
|                                                                  | Working in specified awkward body postures        |                                                                                                                                                                                                                                 |                                                                                                                                                                                                                                                        |                                                                                                                                                                                                                                         |                                                                                                             | - Working in a bent over, squatting, kneeling or lying position, working above your head [1: frequently; 2: sometimes; 3: rarely; 4: never]                                                                                                                                                                                                                                      |                                                                                                                                                                                                                                                                                                                                  |                                                                                                                                                                                                                                                                                                                                  |
|                                                                  | Working in uncomfortable and tiring body postures |                                                                                                                                                                                                                                 |                                                                                                                                                                                                                                                        |                                                                                                                                                                                                                                         | Do you have to work in uncomfortable body postures [yes regularly, yes sometimes, no?]                      |                                                                                                                                                                                                                                                                                                                                                                                  | Please tell me, using the same scale, your main paid job involve tiring or painful positions?<br>[1 All of the time,<br>2 Almost all of the time,<br>3 Around 3/4 of the time,<br>4 Around half of the time,<br>5 Around 1/4 of the time,<br>6 Almost never,<br>7 Never,<br>8 DK (don't know),<br>9 Ref]                         | Please tell me, using the same scale, your main paid job involve tiring or painful positions?<br>[1 All of the time,<br>2 Almost all of the time,<br>3 Around 3/4 of the time,<br>4 Around half of the time,<br>5 Around 1/4 of the time,<br>6 Almost never,<br>7 Never,<br>8 DK (don't know),<br>9 Ref]                         |
| Physical work effort                                             | Strenuous work                                    | How physical strenuous do you normally perform your current work to be?<br>[0-not at all, 1,2,3,4,5,6,7,8,9,10 -maximum hard]                                                                                                   | Does your work involve so much effort that it causes you to breathe more rapidly?<br>[almost the whole time, approx. 3/4 of the time, approx. half of the time, very little of the time]                                                               | Is your work physically light, fairly light, [a bit strenuous, quite strenuous or very strenuous ?]                                                                                                                                     |                                                                                                             |                                                                                                                                                                                                                                                                                                                                                                                  |                                                                                                                                                                                                                                                                                                                                  |                                                                                                                                                                                                                                                                                                                                  |
|                                                                  | Strenuous lifting                                 | How often do you find the typical lifts at work strenuous?<br>[always, often,sometimes,rarely,never]                                                                                                                            |                                                                                                                                                                                                                                                        |                                                                                                                                                                                                                                         |                                                                                                             |                                                                                                                                                                                                                                                                                                                                                                                  |                                                                                                                                                                                                                                                                                                                                  |                                                                                                                                                                                                                                                                                                                                  |
| Vibrations                                                       | Vibrations unspecified                            | How much of your time at work are you subjected to intense vibrations (for example from a tractor, truck etc.)?<br>[almost all the time, approx. 3/4 of the time, approx 1/2 of the time, approx 1/4 of the time, rarely,never] |                                                                                                                                                                                                                                                        | Is there vibration in your working environment or in your work?<br>[1 There isn't any<br>If there is,<br>Does it bother you<br>2 not at all<br>3 a little<br>4 quite a lot<br>5 or a lot<br>8 Cannot say<br>9 No answer]                |                                                                                                             | I will now read out a number of working conditions to you. For each item, please tell me whether these occur on your occupation as <insert occupation from F100-102> frequently, sometimes, rarely or never.<br>- Working with heavy vibrations and reverberations that you can feel in your body<br>[1: frequently; 2: sometimes; 3: rarely; 4: never]                          | Please tell me, using the following scale, are you exposed at work to ... vibrations from hand tools, machinery, etc?<br>[1 All of the time,<br>2 Almost all of the time,<br>3 Around 3/4 of the time,<br>4 Around half of the time,<br>5 Around 1/4 of the time,<br>6 Almost never,<br>7 Never,<br>8 DK (don't know),<br>9 Ref] | Please tell me, using the following scale, are you exposed at work to ... vibrations from hand tools, machinery, etc?<br>[1 All of the time,<br>2 Almost all of the time,<br>3 Around 3/4 of the time,<br>4 Around half of the time,<br>5 Around 1/4 of the time,<br>6 Almost never,<br>7 Never,<br>8 DK (don't know),<br>9 Ref] |
|                                                                  | Arm/hand vibrations                               |                                                                                                                                                                                                                                 | Are you, in your day-to-day work, exposed to vibrations from machines or tools that you hold in your hands?<br>[almost the whole time, approx. 3/4 of the time, approx. half of the time, approx. 1/4 of the time,very little of the time]             |                                                                                                                                                                                                                                         | Does your job require you to use tools that shake or tremble heavily?<br>[yes regularly, yes sometimes, no] |                                                                                                                                                                                                                                                                                                                                                                                  |                                                                                                                                                                                                                                                                                                                                  |                                                                                                                                                                                                                                                                                                                                  |

| Country Domain                                                    | Dimesions                                                                                  | Denmark<br>Work Environment and Health in Denmark (survey 2012, 2014, 2016)                                                                                                                                                      | Norway<br>Survey of living conditions: Working environment                                                                                                                                                                                                                                    | Finland<br>Finland: The Finnish National Work and Health Survey                                                                                                                                                                                                                                  | Netherlands<br>Netherlands Working Conditions Survey | Germany<br>German BIBB/BAuA Employment Survey 2011/2012                                                                                                                                                                                                                                                                                                                             | Spain<br>Spanish National Working Conditions survey                                                                                                                                                                                                                                                                            | Europe<br>European working conditions survey                                                                                                                                                                                                                                                                                   |
|-------------------------------------------------------------------|--------------------------------------------------------------------------------------------|----------------------------------------------------------------------------------------------------------------------------------------------------------------------------------------------------------------------------------|-----------------------------------------------------------------------------------------------------------------------------------------------------------------------------------------------------------------------------------------------------------------------------------------------|--------------------------------------------------------------------------------------------------------------------------------------------------------------------------------------------------------------------------------------------------------------------------------------------------|------------------------------------------------------|-------------------------------------------------------------------------------------------------------------------------------------------------------------------------------------------------------------------------------------------------------------------------------------------------------------------------------------------------------------------------------------|--------------------------------------------------------------------------------------------------------------------------------------------------------------------------------------------------------------------------------------------------------------------------------------------------------------------------------|--------------------------------------------------------------------------------------------------------------------------------------------------------------------------------------------------------------------------------------------------------------------------------------------------------------------------------|
| Lifting, holding & carrying of loads (pushing & pulling of loads) | Lifting, holding & carrying of loads                                                       | How much of your time at work do you carry or lift objects?<br>(Is your answer "never" please skip to question 27)[almost all the time, approx. 3/4 of the time, approx. 1/2 of the time, approx. 1/4 of the time, rarely,never] | Do have to lift anything that weighs more than 20 kg on a daily basis, and if so how many times a day?<br>[Yes, at least 20 times a day, yes, 5-19 times, yes, 1-4 times,no]                                                                                                                  | Does your work involve lifting or carrying by hand, without any equipment?<br>[1 not at all<br>If yes<br>2 occasionally<br>3 weekly<br>4 Daily<br>5 several times a day<br>6 or several times an hour ?<br>8 Cannot say<br>9 No answer]                                                          |                                                      | I will now read out a number of working conditions to you. For each item, please tell me whether these occur on your occupation as <insert occupation from F100-102> frequently, sometimes, rarely or never.<br>- Lifting and carrying loads of more than <for male target persons insert: 20 kg, for females insert: 10 kg ><br>[1: frequently; 2: sometimes; 3: rarely, 4: never] |                                                                                                                                                                                                                                                                                                                                |                                                                                                                                                                                                                                                                                                                                |
|                                                                   | Whole body vibrations                                                                      |                                                                                                                                                                                                                                  | Are you, in your day-to-day work, exposed to vibrations that cause your whole body to shake, e.g. from a tractor, forklift truck or other piece of machinery?<br>[almost the whole time, approx. 3/4 of the time, approx. half of the time, approx. 1/4 of the time, very little of the time] |                                                                                                                                                                                                                                                                                                  |                                                      |                                                                                                                                                                                                                                                                                                                                                                                     |                                                                                                                                                                                                                                                                                                                                |                                                                                                                                                                                                                                                                                                                                |
| Work with computer                                                | Work with computers/laptops/smartphone                                                     |                                                                                                                                                                                                                                  | Do you work in front of a computer screen?                                                                                                                                                                                                                                                    | Do you use a personal computer or computer terminal regularly at work<br>[no/yes]                                                                                                                                                                                                                |                                                      | Please think about your job as <insert occupation from F100-102>. I am now going to name some selected activities. Please tell me how often these activities occur during your work: frequently, sometimes or never.<br>- Working with computers<br>[1: frequently; 2: sometimes; 3: never]                                                                                         | Please tell me, using the same scale, does your main paid job involve working with computers, laptops, smartphones etc.<br>[1 All of the time,<br>2 Almost all of the time,<br>3 Around ¾ of the time,<br>4 Around half of the time,<br>5 Around ¼ of the time,<br>6 Almost never,<br>7 Never,<br>8 DK (don't know),<br>9 Ref] | Please tell me, using the same scale, does your main paid job involve working with computers, laptops, smartphones etc.<br>[1 All of the time,<br>2 Almost all of the time,<br>3 Around ¾ of the time,<br>4 Around half of the time,<br>5 Around ¼ of the time,<br>6 Almost never,<br>7 Never,<br>8 DK (don't know),<br>9 Ref] |
|                                                                   |                                                                                            |                                                                                                                                                                                                                                  | Do you work with a keyboard or mouse? yes/no                                                                                                                                                                                                                                                  | Is it a laptop computer?<br>[no/yes]                                                                                                                                                                                                                                                             |                                                      | -Using the Internet or processing emails<br>[1: frequently; 2: sometimes; 3: never]                                                                                                                                                                                                                                                                                                 |                                                                                                                                                                                                                                                                                                                                |                                                                                                                                                                                                                                                                                                                                |
|                                                                   |                                                                                            |                                                                                                                                                                                                                                  | How many hours do you spend doing so on a normal working day? Include work that you do at home, but not personal use. ROUND TO THE NEAREST WHOLE HOUR. HOURS [0..24]                                                                                                                          | Does your workplace have a separate keyboard and screen for your laptop computer?<br>[no/yes]                                                                                                                                                                                                    |                                                      | What percentage of your working hours in your occupation as <insert occupation from F100-102> do you spend on average working with computers?                                                                                                                                                                                                                                       |                                                                                                                                                                                                                                                                                                                                |                                                                                                                                                                                                                                                                                                                                |
|                                                                   |                                                                                            |                                                                                                                                                                                                                                  | How many hours do you spend doing so on a normal working day? Include work that you do at home, but not personal use. ROUND TO THE NEAREST WHOLE HOUR. HOURS [0..24]                                                                                                                          | Do you use a personal computer, computer terminal or laptop computer<br>[1 for less than an hour<br>2 1-2 hours<br>3 3-4 hours<br>4 over 4 hours<br>5 almost every day<br>6 or more rarely?]                                                                                                     |                                                      |                                                                                                                                                                                                                                                                                                                                                                                     |                                                                                                                                                                                                                                                                                                                                |                                                                                                                                                                                                                                                                                                                                |
| General / mixed exposure                                          | Strong gripping and turning movements of the hand                                          |                                                                                                                                                                                                                                  |                                                                                                                                                                                                                                                                                               | Does your work involve strong gripping or turning movements of your hand such as using a screwdriver, cutting, twisting or moving heavy objects manually?<br>[1 not at all<br>If yes<br>2 daily for at least 1-2 hours<br>3 less than an hour a day<br>4 almost every day<br>5 or occasionally?] |                                                      |                                                                                                                                                                                                                                                                                                                                                                                     |                                                                                                                                                                                                                                                                                                                                |                                                                                                                                                                                                                                                                                                                                |
|                                                                   | Manual work that requires great dexterity, fast sequences of movements or greater strength |                                                                                                                                                                                                                                  |                                                                                                                                                                                                                                                                                               |                                                                                                                                                                                                                                                                                                  |                                                      | I will now read out a number of working conditions to you. For each item, please tell me whether these occur on your occupation as <insert occupation from F100-102> frequently, sometimes, rarely or never.<br>- Doing manual work that requires great dexterity, fast sequences of movements or greater strength<br>[1: frequently; 2: sometimes; 3: rarely; 4: never]            |                                                                                                                                                                                                                                                                                                                                |                                                                                                                                                                                                                                                                                                                                |
